# Supplementary material
Source: PubMed Central journal article supplement (PMC6069604)

## Supplementary Figure 1 - uncropped scans with size marker indications

### Extended Data Figure 1f

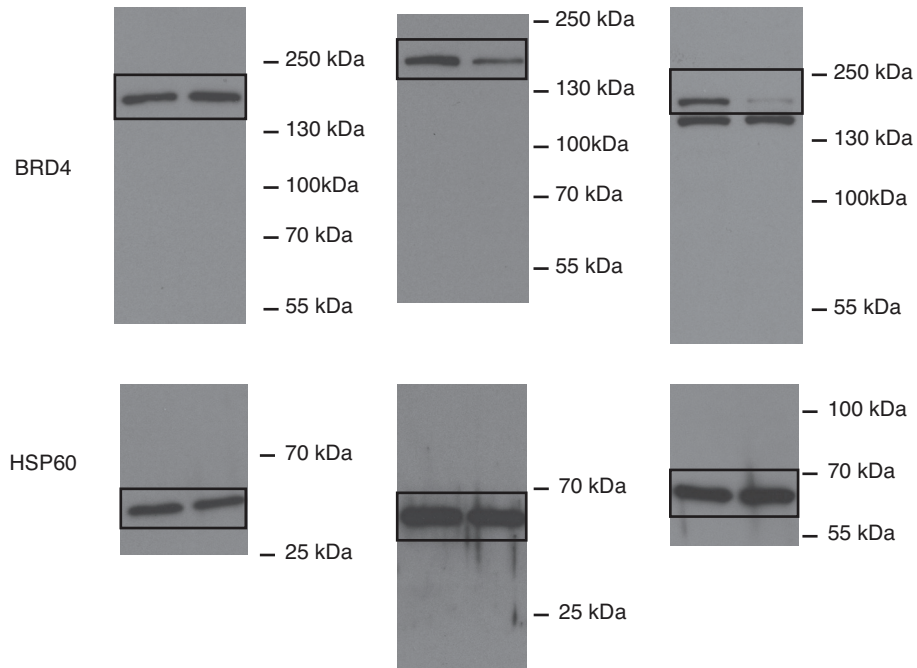

### Extended Data Figure 8 g-h

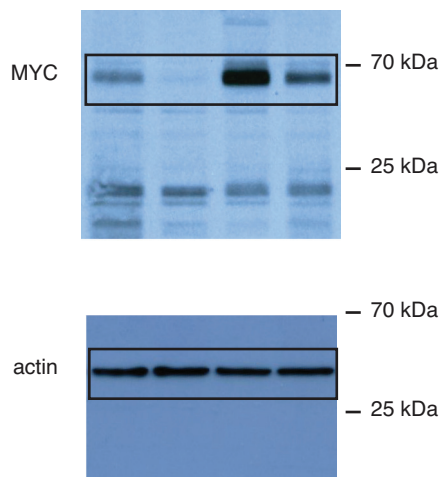

Supplement: NIHMS982369-supplement-_supplemental_1_.pdf [file NIHMS982369-supplement-_supplemental_1_.pdf]
